# Supplementary material for: Preparation of high-yield and ultra-pure Au25 nanoclusters: towards their implementation in real-world applications
Source: Royal Society of Chemistry journal article supplement (doi:10.1039/c8nr08200f), 2019-01-01
Supplement: c8nr08200f1.pdf [file c8nr08200f1.pdf]

Supporting Information

**Preparation of high-yield and ultra-pure Au<sub>25</sub> nanoclusters:  
towards their implementation in real-world applications**

Michael Galchenko<sup>1</sup>, Raphael Schuster<sup>2</sup>, Andres Black<sup>1</sup>, Maria Riedner<sup>2</sup>, Christian Klinke<sup>1,3,\*</sup>

*1 Institute of Physical Chemistry, University of Hamburg,  
Martin-Luther-King-Platz 6, 20146 Hamburg, Germany*

*2 Institute of Organic Chemistry, University of Hamburg,  
Martin-Luther-King-Platz 6, 20146 Hamburg, Germany*

*3 Department of Chemistry, Swansea University – Singleton Park,  
Swansea SA2 8PP, United Kingdom*

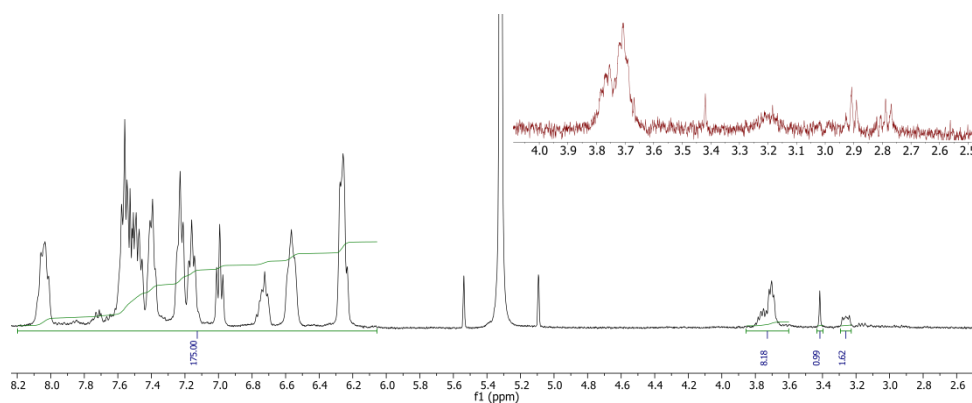

Fig. S1: <sup>1</sup>H NMR spectrum of the “purified” Au<sub>25</sub> nanocluster in CD<sub>2</sub>Cl<sub>2</sub>. The set of peaks from 6.3 to 8.1 ppm correspond to phenyl groups from PPh<sub>3</sub> and SCH<sub>2</sub>CH<sub>2</sub>Ph (integral normalized to 175). The inset shows a <sup>1</sup>H NMR spectrum of a different sample of Au<sub>25</sub> NCs in CD<sub>2</sub>Cl<sub>2</sub> with unbound SCH<sub>2</sub>CH<sub>2</sub>Ph present in solution giving rise to two triplets at 2.8 and 2.9 ppm. These signals originate from alpha and beta CH<sub>2</sub> groups in SCH<sub>2</sub>CH<sub>2</sub>Ph. Proton signals from such alpha/beta group and are known to shift downfield, be broadened or even become undetectable in <sup>1</sup>H or <sup>13</sup>C NMR spectra upon binding to a Au NC surface.<sup>1</sup> All three effects were observed for the CH<sub>2</sub> groups in Au<sub>25</sub> NC-bound SCH<sub>2</sub>CH<sub>2</sub>Ph: We propose that the signal from beta CH<sub>2</sub> is shifted from 2.8 to 3.7 ppm as well as broadened whereas the alpha CH<sub>2</sub> group, closest to the Au core becomes undetectable.

In accordance to a previous report,<sup>2</sup> alpha CH<sub>2</sub> groups of tetraoctylammonium (TOA) molecules are assigned to a signal at 3.25 ppm. Its integral compared to the phenyl regions’ is remarkably low compared to a previous report.<sup>2</sup> The singlet at 3.4 ppm is assigned to the CH<sub>3</sub> group of methanol residually present from the purification.<sup>3</sup>

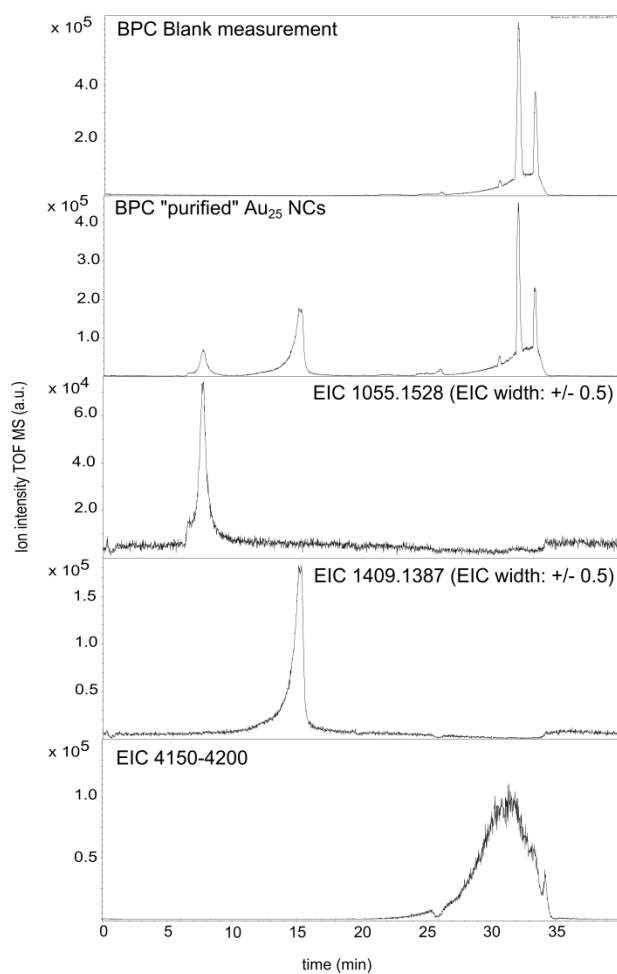

Fig. S2: LC-MS measurement of Au<sub>25</sub> NCs. Base peak and extracted ion chromatograms (BPC and EIC, respectively) obtained by electrospray ionization mass spectrometry (ESI-MS).

## References

- [1] O. Kohlmann, W. E. Steinmetz, X.-A. Mao, W. P. Wuelfing, A. C. Templeton, R. W. Murray, and C. S. Johnson, *J. Phys. Chem. B*, 2001, 105, 8801–8809.
- [2] H. Qian, M. Zhu, E. Lanni, Y. Zhu, M. E. Bier, and R. Jin, *J. Phys. Chem. C*, 2009, 113, 17599–17603.
- [3] R. Jin, C. Liu, S. Zhao, A. Das, H. Xing, C. Gayathri, Y. Xing, N. L. Rosi, R. R. Gil, and R. Jin, *ACS Nano*, 2015, 9, 8530–8536.
